# Supplementary material for: Prevalence of Congenital Disorders of Glycosylation in Childhood Epilepsy and Effects of Anti-Epileptic Drugs on the Transferrin Isoelectric Focusing Test
Source: MDPI journal article supplement (doi:10.3390/genes12081227), 2021-08-10
Supplement: s1 [file s1]

**Table S1:** Clinical features, neuroimaging, and genetic test results of all patients with genetically confirmed childhood epilepsy identified in this study are summarized.

| <b>Number/study ID/diagnosis/sex/age/consanguinity</b> | <b>Presenting symptom (age of onset)/other clinical features</b>       | <b>EEG</b>        | <b>Neuroimaging</b>                   | <b>Molecular genetic test result (number of genes in the TNGSP)</b> |
|--------------------------------------------------------|------------------------------------------------------------------------|-------------------|---------------------------------------|---------------------------------------------------------------------|
| 1/001/ <i>STXBP1</i> disease/F/7yrs/no                 | Seizures (GTCS, GTS, GCS, focal) (18mo), GDD, ASD, aggressive behavior | SpW               | Ventriculomegaly                      | De novo c.560C>T (p.Pro187Leu) in <i>STXBP1</i> by TNGS (127)       |
| 2/004/ <i>WDR45</i> disease/F/13yrs/no                 | GDD (15 mo), seizure (GTCS, focal) (2 yrs), MD (dystonia, spasticity)  | BG asymmetry      | Thin CC, cerebellar atrophy, low NAA  | De novo c.400C>T (p.Arg134*) in <i>WDR45</i> by ES                  |
| 3/009/ <i>GLUT1</i> disease/M/13yrs/no                 | Seizures (AbS, MS, AS, GTS) (12mo), GDD, MD (ataxia), ASD, ADHD        | GSpW, PSpW, FIRDA | Increased T2 signal in subcortical WM | De novo c.940G>A (p.Gly314Ser) in <i>SLC2A1</i> by ES               |
| 4/012/ <i>GLUT1</i> disease/M/4yrs/no                  | Seizures (GTCS) (5mo), GDD                                             | SBG               | N                                     | De novo c.656delA (p.Asn219Thrfs*10) in <i>SLC2A1</i> by ES         |
| 5/013/ <i>CACNA1A</i> disease/F/10yrs/no               | Seizures (AbS, AS) (2mo), GDD                                          | SpW, SW           | N                                     | De novo c.4253G>A (p.Arg1418Gln) in <i>CACNA1A</i> by ES            |

|                                            |                                                                                                                                                                                                     |                                   |                                                                                   |                                                                                  |
|--------------------------------------------|-----------------------------------------------------------------------------------------------------------------------------------------------------------------------------------------------------|-----------------------------------|-----------------------------------------------------------------------------------|----------------------------------------------------------------------------------|
| 6/015/ <i>SLC35A2</i> -<br>CDG/F/2yrs/no   | FTT (day 3), GDD, Seizures (IS) (11mo), dysmorphic features (hypertelorism, low set posteriorly rotated ears, prominent forehead, upslanting palpebral fissures, short nose with upturned nose tip) | Modified HypA, SBG, GSp, MFSp, SW | DM, hypoplastic BS                                                                | De novo c.3G>A (p.Met1?) in <i>SLC35A2</i> by ES                                 |
| 7/018/ <i>DLAT</i><br>disease/M/9yrs/no    | Seizures (GTS, MS, GCS, AbS) (2mo), GDD, MD (dystonia, spasticity)                                                                                                                                  | SW, SBG                           | Microcephaly, DM, frontal lobe atrophy                                            | Unknown c.1689delT (p.Phe563Leufs) in <i>DLAT</i> by TNGS (18)                   |
| 8/046/ <i>ATP1A2</i><br>disease/M/6yrs/no  | Seizures (GTCS) (18mo), GDD                                                                                                                                                                         | N                                 | Chiari I malformation, Increased T2 signal in frontal WM, parietal WM, cerebellum | Maternal (mother affected) c.1091C>T (p.Thr364Met) in <i>ATP1A2</i> by TNGS (87) |
| 9/060/ <i>NEXMIF</i><br>disease/F/11yrs/no | Seizures (AbS, MS) (14mo), ADHD                                                                                                                                                                     | GSSW                              | N                                                                                 | Unknown c.2163delA (p.Lys721Asnfs*8) in <i>NEXMIF</i> by TNGS (127)              |
| 10/061/ <i>SYNGAP1</i><br>disease/F/10yrs/ | Speech delay (18mo), GDD, Seizures (AbS) (2yrs)                                                                                                                                                     | GSpW                              | N                                                                                 | De novo c.1490A>G (p.Tyr497Cys) in <i>SYNGAP1</i> by TNGS (127)                  |

|                                              |                                                                                                                                                 |                     |                                                                                      |                                                                                    |
|----------------------------------------------|-------------------------------------------------------------------------------------------------------------------------------------------------|---------------------|--------------------------------------------------------------------------------------|------------------------------------------------------------------------------------|
| 11/067/ <i>KCNQ2</i><br>disease/M/9yrs/no    | Seizures (GTCS, GTS) (day 1),<br>GDD, MD (dystonia, spasticity)                                                                                 | SW, SBG             | N                                                                                    | Not maternal, paternal NA<br>c.821C>T (p.Thr274Met)<br>in <i>KCNQ2</i> by ES       |
| 12/070/ <i>DDX3X</i><br>disease/F/17yrs/yes  | GDD (18mo), Seizures (GTCS)<br>(13yrs), MD (motor apraxia),<br>ASD                                                                              | GPSpW               | Increased T2 signal in<br>right insular, dysgenetic<br>CC, cerebellar volume<br>loss | De novo<br>c.641_643delinsCC<br>(p.Ile214Thrfs*7) in<br><i>DDX3X</i> by ES         |
| 13/085/ <i>SCN1A</i><br>disease/M/3yrs/no    | Seizures (GTCS, GTC, focal)<br>(4mo), GDD                                                                                                       | BG asymmetry,<br>SW | N                                                                                    | De novo c.635T>C<br>(p.Val212Ala) in <i>SCN1A</i><br>by TNGS (127)                 |
| 14/091/18q<br>deletion<br>syndrome/M/9yrs/no | Seizures (focal) (22mo), GDD,<br>dysmorphic features (flat nasal<br>bridge, prominent jaw, small<br>posteriorly rotated ears,<br>hypertelorism) | SpW, SW             | DM                                                                                   | 18q22.1q23 deletion by<br>microarray                                               |
| 15/095/ <i>NEXMIF</i><br>disease/F/14yrs/no  | GDD (6mo), Seizures (AS,<br>AbS) (5yrs), ASD, ADHD,<br>OCD, separation anxiety                                                                  | SBG, SpW            | N                                                                                    | De novo c.114C>T<br>(p.Arg481*) in <i>NEXMIF</i> by<br>ES                          |
| 16/104/ <i>FOXG1</i><br>disease/M/3yrs/no    | Seizures (GTS, IS) (2.5mo),<br>GDD                                                                                                              | SBG                 | Microcephaly,<br>dysmorphic CC,<br>thinned hippocampus                               | Not maternal, paternal NA<br>c.586C>T (p.Gln196*) in<br><i>FOXG1</i> by TNGS (127) |

|                                                                  |                                                                                                                  |                                                   |                                                                       |                                                                    |
|------------------------------------------------------------------|------------------------------------------------------------------------------------------------------------------|---------------------------------------------------|-----------------------------------------------------------------------|--------------------------------------------------------------------|
| 17/109/ <i>CNKSR2</i><br>disease/M/9yrs/no                       | Seizures (GTCS) (3.5yrs),<br>GDD, ADHD                                                                           | Sp, SW                                            | NP                                                                    | Maternal c.114delG<br>(p.Ile39Serfs*14) in<br><i>CNKSR2</i> by ES  |
| 18/117/Angelman<br>syndrome ( <i>UBE3A</i><br>disease)/M/7yrs/no | Seizures (GTS, AS) (day 7),<br>GDD, microcephaly, prognathia                                                     | GSpW, PSpW                                        | Thinned CC                                                            | De novo c.1396A>G<br>(p.Lys466Glu) in <i>UBE3A</i><br>by TNGS (87) |
| 19/131/ <i>KCNQ2</i><br>disease/F/11yrs/no                       | Seizures (GTS) (day2), GDD,<br>MD (ataxia), ASD                                                                  | Prolonged<br>attenuations of<br>cortical activity | N                                                                     | De novo c.700A>C<br>(p.Thr234Pro) in <i>KCNQ2</i><br>by DS         |
| 20/132/ <i>KMT2B</i><br>disease/M/17yrs/no                       | GDD (12mo), Seizures<br>(atypical) (6yrs), MD (dystonia,<br>dyskinesia), ASD, self-harm,<br>aggressive behaviour | SpSW                                              | Increased FLAIR signal<br>in PV WM                                    | De novo c.7551-<br>14_7561del25 in <i>KMT2B</i><br>by ES           |
| 21/139/ <i>KCNB1</i><br>disease/M/12yrs/no                       | GDD (6mo), Seizures (GTCS,<br>IS, MS, AS, focal, reflex)<br>(12mo), GDD                                          | SBG, Sp, SPSW                                     | Increased T2 signal in<br>left frontal and<br>peritrigonal WM         | De novo c.1222C>G<br>(p.Pro408Ala) in <i>KCNB1</i><br>by ES        |
| 22/142/ <i>PPP2R5D</i><br>disease/F/6yrs/no                      | Prematurity with fetal<br>tachycardia, Seizures (MS) (day<br>3), GDD                                             | Discontinuous<br>BG, SW                           | PV WM atrophy,<br>thinned CC, increase T2<br>signal in right thalamus | De novo c.592G>A<br>(p.Glu198Lys) in<br><i>PPP2R5D</i> by ES       |
| 23/155/ <i>TCF20</i><br>disease/F/5yrs/no                        | Seizure (MS, GTS) (2yrs),<br>GDD, MD (intention tremor)                                                          | GPSpSW, SpW,<br>PSpW                              | Mild cerebellar atrophy                                               | De novo c.3997delC<br>(p.Leu1333Serfs*18) in<br><i>TCF20</i> by ES |

|                                             |                                                                                                        |                   |                                                                          |                                                                      |
|---------------------------------------------|--------------------------------------------------------------------------------------------------------|-------------------|--------------------------------------------------------------------------|----------------------------------------------------------------------|
| 24/157/ <i>SCN1A</i><br>disease/F/8yrs/no   | Seizures (GTCS, AbS, MS, focal) (2mo), GDD, ASD                                                        | SpSW, SBG         | N                                                                        | Unknown c.4934G>A (p.Arg1645Gln) in <i>SCN1A</i> by TNGS (3)         |
| 25/158/ <i>NEXMIF</i><br>disease/F/19yrs/no | Unknown, Seizures (GTCS, dyscognitive) (11yrs), GDD, anxiety disorder, self-harm, aggressive behaviour | Sp, PSp           | Increased T2 signal in left hippocampus                                  | Unknown c.336G>A (p.Trp112*) in <i>NEXMIF</i> by ES                  |
| 26/159/ <i>GRIN2B</i><br>disease/M/22yrs/no | Seizures (GTCS, AS, AbS) (2 yrs), GDD, MD (tic disorder), ADHD, ASD, BPD, aggressive behaviour         | N                 | Thinned CC                                                               | Unknown c.3883C>T (p.Arg1295Trp) in <i>GRIN2B</i> by TNGS (87)       |
| 27/166/ <i>GABRA5</i><br>disease/M/5yrs/no  | Seizures (MS, focal) (3mo), GDD, MD (choreoathetosis)                                                  | PSpW              | Microcephaly, thinned CC, Increased T2 signal in frontal and parietal WM | De novo mosaic c.902C>G (p.Thr301Arg) in <i>GABRA5</i> by ES         |
| 28/177/ <i>SLC6A1</i><br>disease/F/4yrs/no  | GDD (3mo), Seizures (AS, MS) (9mo), ASD                                                                | Sp                | N                                                                        | De novo c.881_883delTCT (p.Phe294del) in <i>SLC6A1</i> by TNGS (127) |
| 29/182/ <i>MECP2</i><br>disease/F/11yrs/yes | GDD (6mo), Seizures (GTCS) (2yrs), MD (dystonia)                                                       | GSSW, SBG, Sp, SW | Microcephaly, reduced NAA                                                | De novo c.763C>T (p.Arg255*) in <i>MECP2</i> by ES                   |

|                                              |                                                                                |         |                                                          |                                                                                                                           |
|----------------------------------------------|--------------------------------------------------------------------------------|---------|----------------------------------------------------------|---------------------------------------------------------------------------------------------------------------------------|
| 30/193/ <i>HIVEP2</i><br>disease/F/11yrs/no  | GDD (6mo), Seizures (GTCS, AbS, MS) (20mo), ADHD                               | SpW     | N                                                        | De novo c.6871C>T (p.Gln2291*) in <i>HIVEP2</i> by ES                                                                     |
| 31/194/ <i>RNASEH2C</i><br>disease/F/6yrs/no | Microcephaly (day 1), GDD, seizures (GTCS) (5mo), MD (dystonia, spasticity CP) | SBG, Sp | Microcephaly, thinned CC, calcification of basal ganglia | Cmp Htz<br>Maternal c.205C>T (p.Arg69Trp); paternal c.348+5G>A in <i>RNASEH2C</i> by TNGS (7)                             |
| 32/200/ <i>MBOAT7</i><br>disease/F/7yrs/no   | Seizures (AS, GTCS, MS) (2mo), GDD, aggressive behaviour                       | MISF    | Increased T2 signal in GP                                | Cmp Htz<br>Maternal c.758_778del21 (p.Glu253_Ala259del); Paternal c.680_690dup11 (p.Leu231Cysfs*8) in <i>MBOAT7</i> by ES |
| 33/202/ <i>SCN2A</i><br>disease/F/2yrs/no    | Seizures (GTS) (3mo)                                                           | SBG, SW | N                                                        | Paternal c.2659G>A (p.Val887Ile) in <i>SCN2A</i> by TNGS (127)                                                            |
| 34/205/ <i>SCN2A</i><br>disease/F/4yrs/no    | Seizures (GTCS) (3mo), GDD                                                     | SBG     | Thinned CC, DM                                           | Paternal (father affected) c.2828_2829delGGinsAT (p.Trp943Tyr) in <i>SCN2A</i> by TNGS (87)                               |

|                                         |                                                                                                                                        |    |                                                   |                                                                                           |
|-----------------------------------------|----------------------------------------------------------------------------------------------------------------------------------------|----|---------------------------------------------------|-------------------------------------------------------------------------------------------|
| 35/211/ <i>PMM2</i> -<br>CDG/M/18yrs/no | GDD (3mo), Seizures (GTCS, MS, CPS) (3.5yrs), MD (ataxia), scoliosis, pectus carniatum, kyphosis                                       | N  | Cerebellar atrophy, brainstem atrophy, small pons | Cmp Htz<br>c.710C>T (p.Thr237Met);<br>c.447+5G>A (variant IVS5+5G>A) in <i>PMM2</i> by ES |
| 36/230/ <i>PMM2</i> -<br>CDG/M/3yrs/no  | FTT (6 wks), GDD, Seizures (GTCS) (18mo), MD (spasticity), dysmorphic features (inverted nipples, low-set ears, asymmetric chest wall) | NP | Thinned CC, cerebellar atrophy, small pons        | Cmp Htz<br>c.422G>A (p.Arg141His);<br>c.43G>A (p.Gly15Arg) in <i>PMM2</i> by DS           |

### Abbreviations (listed alphabetically):

AbS= absence seizures; ADHD= attention-deficit/hyperactivity disorder; AS = atonic seizures; ASD= autism spectrum disorder; BG= background; BS= brainstem; CC= corpus callosum; CDG= congenital disorders of glycosylation; Cmp=compound; CP= cerebral palsy; CPS= complex partial seizures; DM= delayed myelination; EEG= electroencephalography; F= female; FIRDA= frontal intermittent rhythmic delta activity; FTT= failure to thrive; GDD= global developmental delay; GP= globus pallidus; GSp= generalized spikes; GSpSW= generalized polyspike-and-slow waves; GSpW= generalized spike-and-waves; GSSW= generalized spike-and-slow-waves; GTCS= generalized tonic-clonic seizures; GTS= generalized tonic seizure; Htz= heterozygous; HypA= hhypsarrhythmia; IS= infantile spasms; mo= months; M= male; MD= movement disorder; MFSp= multifocal spikes; MISF= multiple independent spike foci; MRI= magnetic resonance imaging; MS= myoclonic seizure; N= normal; N/A= not available; NAA= N-acetylaspartic acid; NP= not performed; PSpW = polyspike-and-waves; PV= periventricular; SBG= slowing of background; Sp=

spikes; SpSW= spike-and-slow waves; SpW= spike and waves; SW= sharp waves; TNGS = targeted next-generation sequencing panels; ES= exome sequencing; wk= weeks; WM= white matter; yrs= years



**Table S2.** Please refer to our previously published studies for the results of the 48 patients with genetic diagnoses, who were included in the current study.

| Study ID(s)                                                                                                                                                                                                     | References      |
|-----------------------------------------------------------------------------------------------------------------------------------------------------------------------------------------------------------------|-----------------|
| 002, 014, 017, 020, 025, 032, 033, 041, 056, 057, 058, 073, 081, 082, 083, 090, 102, 106, 111, 112, 118, 119, 120, 122, 130, 138, 144, 145, 146, 148, 150, 151, 172, 173, 174, 181,184, 190, 191, 195, 197, 203 | Costain 2019    |
| 031, 210, 215, 222, 224                                                                                                                                                                                         | Al Teneiji 2017 |
| 165                                                                                                                                                                                                             | Jilani 2019     |

## References

- Al Teneiji, A. et al. Phenotypic and genotypic spectrum of congenital disorders of glycosylation type I and type II. *Mol Genet Metab* **120**, 235-242 (2017).
- Costain, G., Cordeiro, D., Matviychuk, D. & Mercimek-Andrews. S. Clinical Application of Targeted Next-Generation Sequencing Panels and Whole Exome Sequencing in Childhood Epilepsy. *Neuroscience* **418**, 291-310 (2019)
- Jilani, A. et al. High diagnostic yield of direct Sanger sequencing in the diagnosis of neuronal ceroid lipofuscinoses. *JIMD Rep.* 50, 20-30 (2019).

**Table S3:** *In silico* analysis of variants in genes identified in patients with childhood epilepsy are listed in Table S3.

| Gene<br>NM#<br>(reference)                         | Study ID/variant                                                           | SIFT     | MutTaster           | PolyPhen-<br>2<br>(HumVar) | Conservation<br>in species<br>(Amino<br>Acid) | gmAD<br>allele<br>count<br>in allele<br>number | Variant<br>Classification                               |
|----------------------------------------------------|----------------------------------------------------------------------------|----------|---------------------|----------------------------|-----------------------------------------------|------------------------------------------------|---------------------------------------------------------|
| <b><i>ALG3</i></b><br>(no NM# in the<br>result)(1) | 215/maternal and<br>paternal<br>(homozygous)<br>c.165C>T<br>(p.Val54fs*66) | NA       | NA                  | NA                         | NA                                            | 0                                              | Pathogenic<br>(PVS1, PS3,<br>PM2)                       |
| <b><i>ALG11</i></b><br>(NM<br>_001004127.2)(1)     | 031/maternal and<br>paternal (homozygous)<br>c. 1241T>A<br>(p.Ile414Asn)   | Damaging | Disease-<br>Causing | Possibly<br>Damaging       | 9 out of 10                                   | 0                                              | VUS<br>(PM2, PP3,<br>PP2)                               |
| <b><i>ATPIA2</i></b><br>(NM_000702.3)              | 046/maternal<br>(symptomatic)<br>c.1091C>T<br>(p.Thr364Met)                | Damaging | Disease-<br>Causing | Probably<br>Damaging       | 7 out of 7                                    | 0                                              | Likely<br>Pathogenic<br>(PS2, PM2,<br>PP2, PP3,<br>PP5) |

|                                                            |                                                                |           |                     |                      |            |   |                                                 |
|------------------------------------------------------------|----------------------------------------------------------------|-----------|---------------------|----------------------|------------|---|-------------------------------------------------|
| <b><i>CACNA1A</i></b><br><b>(NM_001127221.1)</b>           | 013/de novo<br>c.4253G>A<br>(p.Arg1418Gln)                     | Tolerated | Disease-<br>Causing | Benign               | 5 out of 7 | 0 | VUS<br>(PM2, PM6)                               |
| <b><i>CNKS2</i></b><br><b>(NM_014927.3)</b>                | 109/maternal<br>(hemizygous)<br>c.114delG<br>(p.Ile39Serfs*14) | NA        | NA                  | NA                   | NA         | 0 | Pathogenic<br>(PVS1, PM2,<br>PP5)               |
| <b><i>DDX3X</i></b><br><b>(NM_001356.4)</b>                | 070/de novo<br>c.641_643delinsCC<br>(p.Ile214Thrfs*7)          | NA        | NA                  | NA                   | NA         | 0 | Pathogenic<br>(PVS1, PM2,<br>PM6, PP5)          |
| <b><i>DLAT</i></b><br><b>(did not have NM<br/>on test)</b> | 018/unknown<br>c.1689delT<br>(p.Phe563Leufs)                   | NA        | NA                  | NA                   | NA         | 0 | Likely<br>Pathogenic<br>(PVS1, PM2)             |
| <b><i>FOXG1</i></b><br><b>(NM_005249.3)</b>                | 104/unknown<br>c.586C>T<br>(p.Gln196*)                         | NA        | NA                  | NA                   | NA         | 0 | Pathogenic<br>(PVS1, PM2,<br>PP5)               |
| <b><i>GABRA5</i></b><br><b>(NM_000810.3)</b>               | 166/de novo mosaic<br>c.902C>G<br>(p.Thr301Arg)                | Damaging  | Disease-<br>Causing | Probably<br>Damaging | 8 out of 9 | 0 | Likely<br>Pathogenic<br>(PM2, PM6,<br>PP2, PP3) |

|                                       |                                            |          |                     |                      |            |                |                                                    |
|---------------------------------------|--------------------------------------------|----------|---------------------|----------------------|------------|----------------|----------------------------------------------------|
| <b><i>GRIN2B</i></b><br>(NM_000834.3) | 159/unknown<br>c.3883C>T<br>(p.Arg1295Trp) | Damaging | Disease-<br>Causing | Probably<br>Damaging | 8 out of 9 | 1 in<br>251466 | VUS<br>(PM2, PP3)                                  |
| <b><i>HIVEP2</i></b><br>(NM_006734)   | 193/de novo<br>c.6871C>T<br>(p.Gln2291*)   | NA       | NA                  | NA                   | NA         | 0              | Pathogenic<br>(PVS1, PM2,<br>PM6)                  |
| <b><i>KCNB1</i></b><br>(NM_004975.2)  | 139/de novo<br>c.1222C>G<br>(p.Pro408Ala)  | Damaging | Disease-<br>Causing | Probably<br>Damaging | 8 out of 8 | 0              | Likely<br>Pathogenic<br>(PM1, PM2,<br>PM6, PP3)    |
| <b><i>KCNQ2</i></b><br>(NM_172107.2)  | 067/unknown<br>c.821C>T<br>(p.Thr274Met)   | Damaging | Disease-<br>Causing | Probably<br>Damaging | 8 out of 8 | 0              | Pathogenic<br>(PS3, PM1,<br>PM2, PP2,<br>PP3, PP5) |
|                                       | 131/de novo<br>c.700A>C<br>(p.Thr234Pro)   | Damaging | Disease-<br>Causing | Benign               | 6 out of 8 | 0              | Likely<br>Pathogenic<br>(PM1, PM2,<br>PM6, PP2)    |
| <b><i>KMT2B</i></b><br>(NM_014747.2)  | 132/de novo<br>c.7551-14_7561del25         | NA       | NA                  | NA                   | NA         | 0              | Pathogenic<br>(PVS1, PM2,<br>PM6)                  |

|                                                                      |                                                        |    |    |    |    |                |                                                     |
|----------------------------------------------------------------------|--------------------------------------------------------|----|----|----|----|----------------|-----------------------------------------------------|
| <b><i>MBOAT7</i></b><br><b>(NM_024298.4)</b>                         | 200/paternal<br>c.680_690dup11<br>(p.Leu231Cysfs*8)    | NA | NA | NA | NA | 1 in<br>31356  | Likely<br>Pathogenic<br>(PVS1, PM2)                 |
|                                                                      | 200/maternal<br>c.758_778del21<br>(p.Glu253_Ala259del) | NA | NA | NA | NA | 5 in<br>214278 | Likely<br>Pathogenic<br>(PM2, PM4,<br>PP1, PP5)     |
| <b><i>MECP2</i></b><br><b>(NM_004992.3)</b>                          | 182/de novo<br>c.763C>T<br>(p.Arg255*)                 | NA | NA | NA | NA | 0              | Pathogenic<br>(PVS1, PS3,<br>PS4, PM2,<br>PM6, PP5) |
| <b><i>NEXMIF</i></b><br><b>(KIAA2022)</b><br><b>(NM_001008537.1)</b> | 060/unknown<br>c.2163delA<br>(p.Lys721Asnfs*8)         | NA | NA | NA | NA | 0              | Likely<br>Pathogenic<br>(PVS1, PM2)                 |
|                                                                      | 158/unknown<br>c.336G>A<br>(p.Trp112*)                 | NA | NA | NA | NA | 0              | Likely<br>Pathogenic<br>(PVS1, PM2)                 |
|                                                                      | 095/de novo<br>c.1441C>T<br>(p.Arg481*)                | NA | NA | NA | NA | 0              | Pathogenic<br>(PVS1, PM2,<br>PM6, PP5)              |

|                              |                                                                  |          |                 |                   |              |               |                                                  |
|------------------------------|------------------------------------------------------------------|----------|-----------------|-------------------|--------------|---------------|--------------------------------------------------|
| <b>PMM2</b><br>(NM_000303.2) | 210 and 230/paternal and unknown<br>c.422G>A<br>(p.Arg141His)(1) | Damaging | Disease-Causing | Benign            | 10 out of 10 | 891 in 224376 | Pathogenic (PS3, PM1, PM5, PP2, PP5)             |
|                              | 210/maternal<br>c.691G>A<br>(p.Val231Met)(1)                     | Damaging | Disease-Causing | Probably Damaging | 10 out of 10 | 22 in 282644  | Pathogenic (PS3, PM1, PM2, PM3, PP2, PP3, PP5)   |
|                              | 230/unknown<br>c.43G>A<br>(p.Gly15Arg)                           | Damaging | Disease-Causing | Possibly Damaging | 9 out of 9   | 3 in 268534   | Likely Pathogenic (PM1, PM2, PM3, PP2, PP3, PP5) |
|                              | 211/unknown<br>c.710C>T<br>(p.Thr237Met)                         | Damaging | Disease-Causing | Probably Damaging | 10 out of 10 | 12 in 282470  | Pathogenic (PS3, PM1, PM2, PP2, PP3, PP5)        |
|                              | 211/unknown<br>c.447+5G>A<br>(variant IVS5+5G>A)                 | NA       | NA              | NA                | NA           | 9 in 169754   | VUS (PM2)                                        |

|                                        |                                             |          |                     |                      |              |                 |                                                              |
|----------------------------------------|---------------------------------------------|----------|---------------------|----------------------|--------------|-----------------|--------------------------------------------------------------|
|                                        | 222/unknown<br>c.61C>T<br>(p.Arg21Trp)(1)   | Damaging | Disease-<br>Causing | Probably<br>Damaging | 9 out of 9   | 1 in<br>226464  | Likely<br>Pathogenic<br>(PM1, PM2,<br>PP2, PP3)              |
|                                        | 222/unknown<br>c.647A>G<br>(p.Asn216Ser)(1) | Damaging | Disease-<br>Causing | Probably<br>Damaging | 10 out of 10 | 7 in<br>282534  | Likely<br>Pathogenic<br>(PM1, PM2,<br>PM5, PP2,<br>PP3, PP5) |
|                                        | 224/unknown<br>c.368G>A<br>(p.Arg123Gln)(1) | Damaging | Disease-<br>Causing | Possibly<br>Damaging | 10 out of 10 | 30 in<br>223998 | Pathogenic<br>(PS3, PM1,<br>PM2, PM3,<br>PP2, PP3,<br>PP5)   |
|                                        | 224/unknown<br>c.623G>C<br>(p.Gly208Ala)(1) | Damaging | Disease-<br>Causing | Probably<br>Damaging | 10 out of 10 | 0               | Pathogenic<br>(PS3, PM1,<br>PM2, PM3,<br>PP2, PP3,<br>PP5)   |
| <b>PPP2R5D</b><br><b>(NM_006245.3)</b> | 142/de novo<br>c.592G>A<br>(p.Glu198Lys)    | Damaging | Disease-<br>Causing | Probably<br>Damaging | 9 out of 9   | 0               | Pathogenic                                                   |

|                                                |                                                        |          |                     |                      |            |                 |                                                   |
|------------------------------------------------|--------------------------------------------------------|----------|---------------------|----------------------|------------|-----------------|---------------------------------------------------|
|                                                |                                                        |          |                     |                      |            |                 | (PS3, PM1, PM2, PM6, PP2, PP3)                    |
| <b><i>RNASEH2C</i></b><br><b>(NM_032193.3)</b> | 194/maternal<br>c.205C>T<br>(p.Arg69Trp)               | Damaging | Disease-<br>Causing | Probably<br>Damaging | 5 out of 7 | 23 in<br>250836 | Pathogenic<br>(PS3, PM2, PP1, PP2, PP3, PP5)      |
|                                                | 194/paternal<br>c.348+5G>A                             | NA       | NA                  | NA                   | NA         | 0               | VUS<br>(PM2, PM3)                                 |
| <b><i>SCN1A</i></b><br><b>(NM_001165963.1)</b> | 085/de novo<br>c.635T>C<br>(p.Val212Ala)               | Damaging | Disease-<br>Causing | Probably<br>Damaging | 6 out of 6 | 1 in<br>250484  | Likely<br>Pathogenic<br>(PM1, PM2, PM6, PP3)      |
| <b><i>SCN1A</i></b><br><b>(NM_001202435.1)</b> | 157/unknown<br>c.4934G>A<br>(p.Arg1645Gln)             | Damaging | Disease-<br>Causing | Probably<br>Damaging | 6 out of 6 | 0               | Pathogenic<br>(PS2, PM1, PM2, PM5, PP2, PP3, PP5) |
| <b><i>SCN2A</i></b><br><b>(NM_021007.2)</b>    | 205/paternal<br>(symptomatic)<br>c.2828_2829delGGinsAT | NA       | NA                  | NA                   | NA         | 0               | VUS<br>(PM1, PM2, PP2)                            |



|                                                  |                                                 |          |                     |                      |            |   |                                                                 |
|--------------------------------------------------|-------------------------------------------------|----------|---------------------|----------------------|------------|---|-----------------------------------------------------------------|
|                                                  | (p.Trp943Tyr)                                   |          |                     |                      |            |   |                                                                 |
|                                                  | 202/paternal<br>c.2659G>A<br>(p.Val887Ile)      | Damaging | Disease-<br>Causing | Probably<br>Damaging | 6 out of 6 | 0 | Likely<br>Pathogenic<br>(PM1, PM2,<br>PP2, PP3)                 |
| <b><i>SLC2A1</i></b><br><b>(NM_006516.2)</b>     | 009/de novo<br>c.940G>A<br>(p.Gly314Ser)<br>(   | Damaging | Disease-<br>Causing | Probably<br>Damaging | 8 out of 8 | 0 | Pathogenic<br>(PS1, PS3,<br>PM1, PM2,<br>PM6, PP2,<br>PP3, PP5) |
|                                                  | 012/de novo<br>c.656delA<br>(p.Asn219Thrfs*10)  | NA       | NA                  | NA                   | NA         | 0 | Pathogenic<br>(PVS1, PM2,<br>PM6)                               |
| <b><i>SLC6A1</i></b><br><b>(NM_003042.3)</b>     | 177/de novo<br>c.881_883delTCT<br>(p.Phe294del) | NA       | NA                  | NA                   | NA         | 0 | Likely<br>Pathogenic<br>(PS2, PM2,<br>PP5)                      |
| <b><i>SLC35A2</i></b><br><b>(NM_001042498.2)</b> | 015/de novo<br>c.3G>A<br>(p.Met1?)              | Damaging | Disease-<br>Causing | Benign               | N/A        | 0 | Pathogenic<br>(PVS1, PM2,<br>PM6, PP5)                          |

|                                               |                                                  |          |                     |                      |              |   |                                                         |
|-----------------------------------------------|--------------------------------------------------|----------|---------------------|----------------------|--------------|---|---------------------------------------------------------|
| <b><i>STXBP1</i></b><br><b>(NM_003165.3)</b>  | 001/de novo<br>c.560C>T<br>(p.Pro187Leu)         | Damaging | Disease-<br>Causing | Probably<br>Damaging | 10 out of 10 | 0 | Likely<br>Pathogenic<br>(PM1, PM2,<br>PM6, PP3)         |
| <b><i>SYNGAP1</i></b><br><b>(NM_006772.2)</b> | 061/de novo<br>c.1490A>G<br>(p.Tyr497Cys)        | Damaging | Disease-<br>Causing | Probably<br>Damaging | 6 out of 9   | 0 | VUS<br>(PM2, PM6)                                       |
| <b><i>TCF20</i></b><br><b>(NM_005650.1)</b>   | 155/de novo<br>c.3997delC<br>(p.Leu1333Serfs*18) | NA       | NA                  | NA                   | NA           | 0 | Pathogenic<br>(PVS1, PM2,<br>PM6)                       |
| <b><i>UBE3A</i></b><br><b>(NM_130838.1)</b>   | 117/de novo<br>c.1396A>G<br>(p.Lys466Glu)        | Damaging | Disease-<br>Causing | Probably<br>Damaging | 10 out of 10 | 0 | Likely<br>Pathogenic<br>(PM1, PM2,<br>PM6, PP3,<br>PP5) |
| <b><i>WDR45</i></b><br><b>(NM_007075.3)</b>   | 004/de novo<br>c.400C>T<br>(p.Arg134*)           | NA       | NA                  | NA                   | NA           | 0 | Pathogenic<br>(PVS1, PM2,<br>PM6, PP5)                  |

1. Al Teneiji A, Bruun TU, Sidky S, Cordeiro D, Cohn RD, Mendoza-Londono R, Moharir M, Raiman J, Siriwardena K, Kyriakopoulou L, Mercimek-Mahmutoglu S 2017 Phenotypic and genotypic spectrum of congenital disorders of glycosylation type I and type II. Mol Genet Metab 120:235-242.
